# Supplementary material for: Palmatine from Unexplored Rutidea parviflora Showed Cytotoxicity and Induction of Apoptosis in Human Ovarian Cancer Cells
Source: Toxins (Basel). 2019 Apr 25;11(4):237. doi: 10.3390/toxins11040237 (PMC6521182; doi:10.3390/toxins11040237)
Supplement: Supplementary file 1 [file toxins-11-00237-s001.pdf]

## Supporting Information

### **Palmatine from unexplored *Rutidea parviflora* showed cytotoxicity and induction of apoptosis in human ovarian cancer cells**

Okiemute Rosa Johnson-Ajinwo <sup>1,2</sup>, Alan Richardson <sup>1</sup> and Wen-Wu Li <sup>1,\*</sup>

1      Guy Hilton Research Centre, School of Pharmacy and Bioengineering, Keele University, Thornburrow Drive, ST4 7QB, Stoke-on-Trent, United Kingdom

2      Faculty of Pharmaceutical Sciences, University of Port Harcourt, Nigeria

\*Corresponding author: w.li@keele.ac.uk

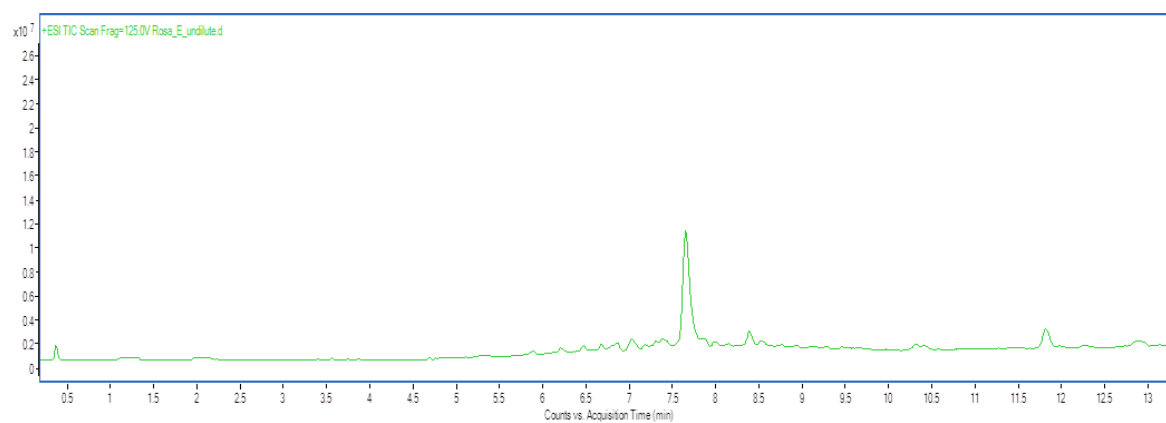

(a)

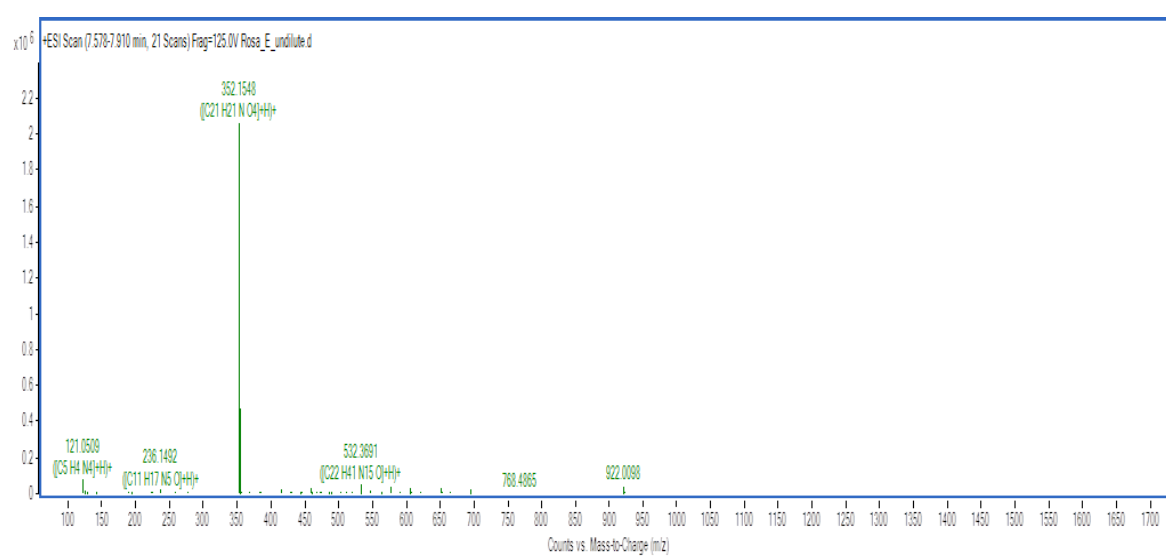

(b)

**Figure S1.** LC-MS chromatogram (a) and MS (b) of palmatine isolated from *Rutidea parviflora*.

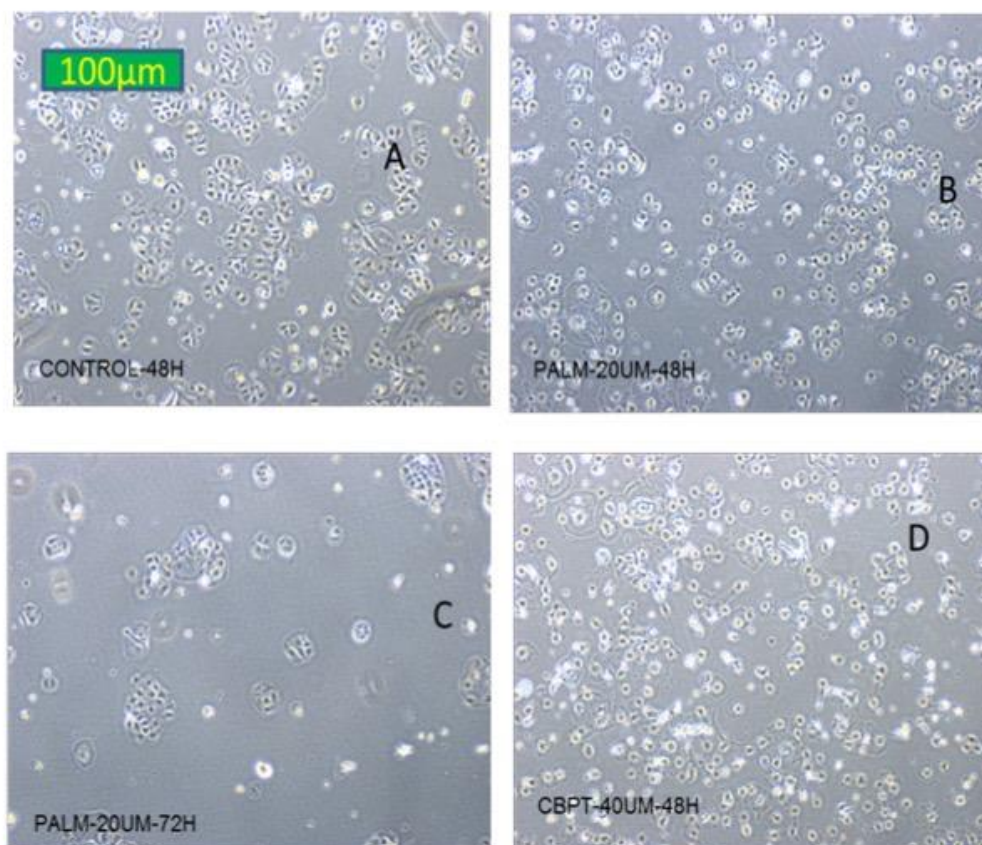

**Figure S2.** The effects of palmatine (20  $\mu$ M) on cell morphology of OVCAR 4 cells monitored by light microscope for 48 or 72 h. The morphological changes observed in the vehicle-treated OVCAR 4 cells which were used as the control (**A**); OVCAR 4 cells treated with 20  $\mu$ M palmatine at 48h (**B**); OVCAR 4 cells treated with 20  $\mu$ M palmatine at 72h (**C**); and cells treated with 40  $\mu$ M carboplatin at 48h (**D**). Representative images of three independent experiments were shown.
